# Supplementary material for: Functional diversity of topological modules in human protein-protein interaction networks
Source: PubMed Central journal article supplement (PMC5701033; doi:10.1038/s41598-017-16270-z), 2017-11-23
Supplement: 41598_2017_16270_MOESM1_ESM.pdf [file 41598_2017_16270_MOESM1_ESM.pdf]

# Supplementary Figures and Tables

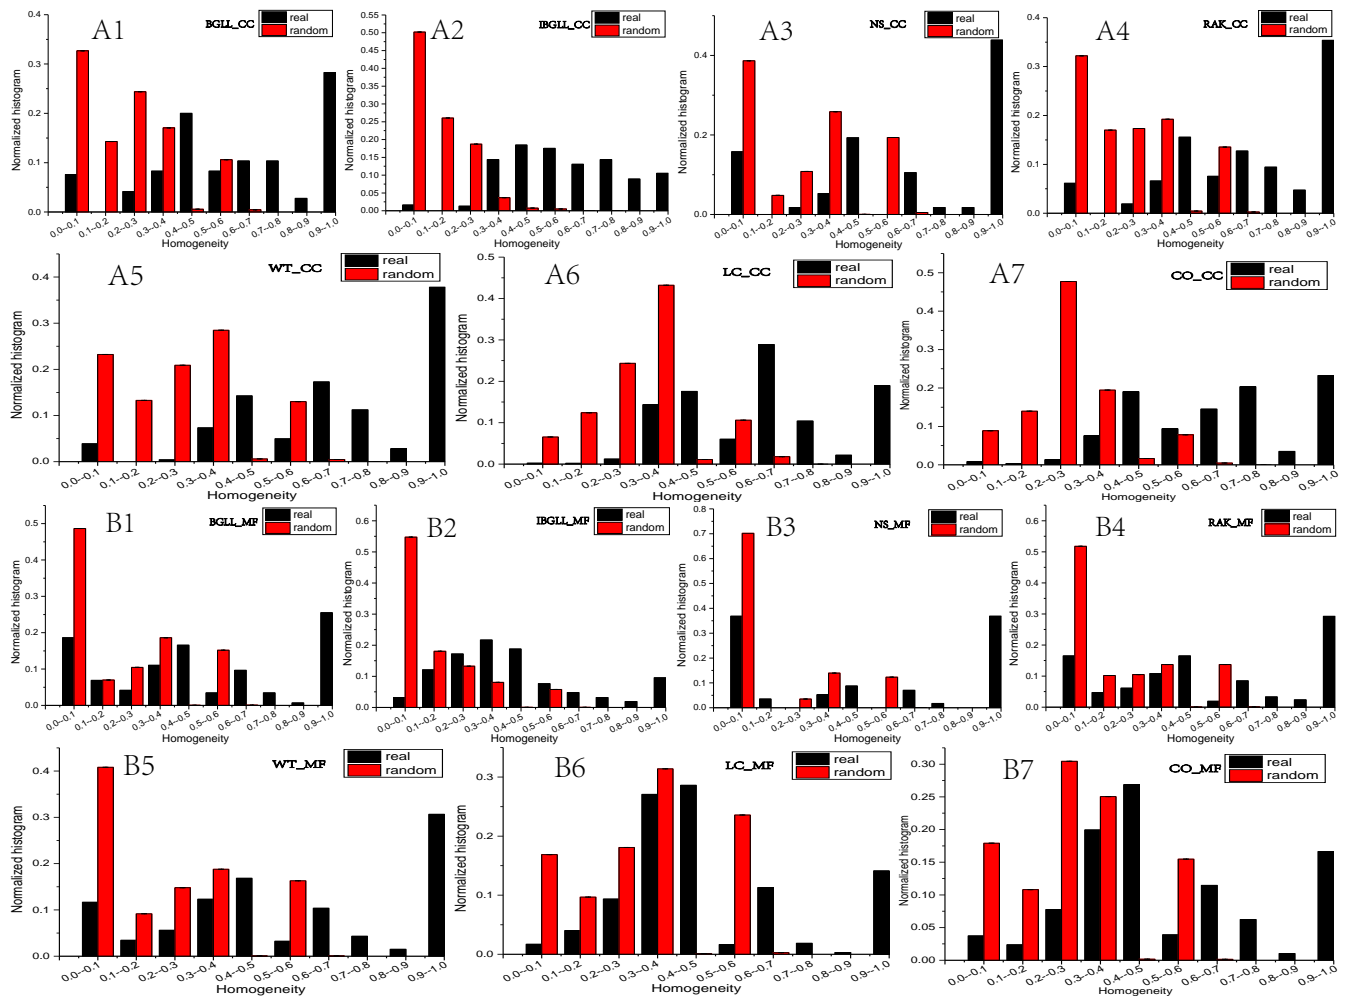

Figure 1. Homogeneity of CC and MF associations at different module sizes.

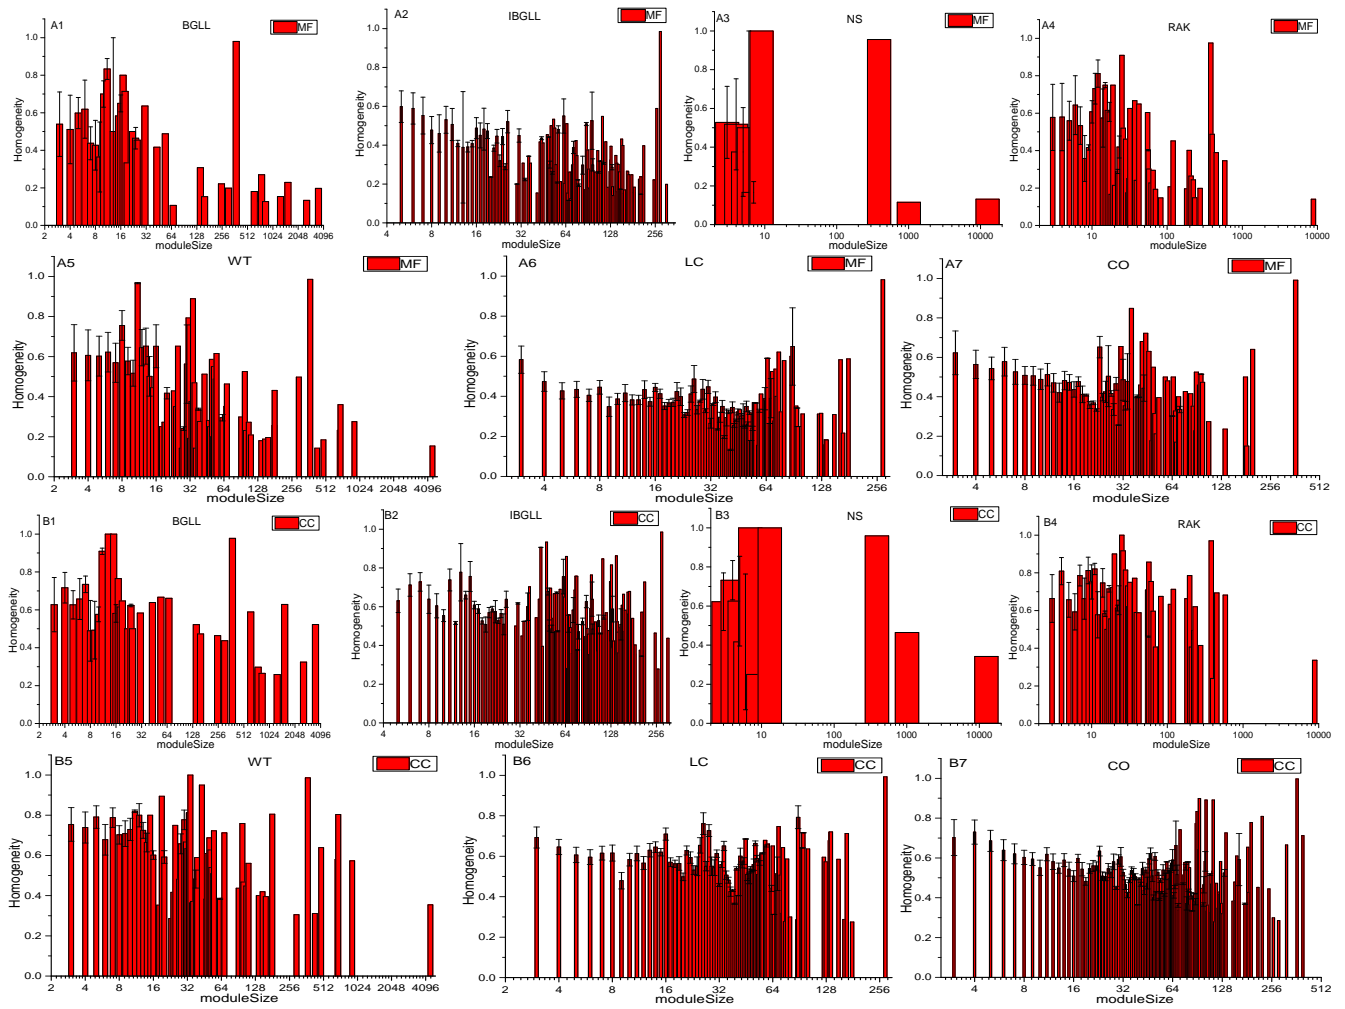

**Figure 2. Homogeneity of MF and CC associations at different module sizes.**

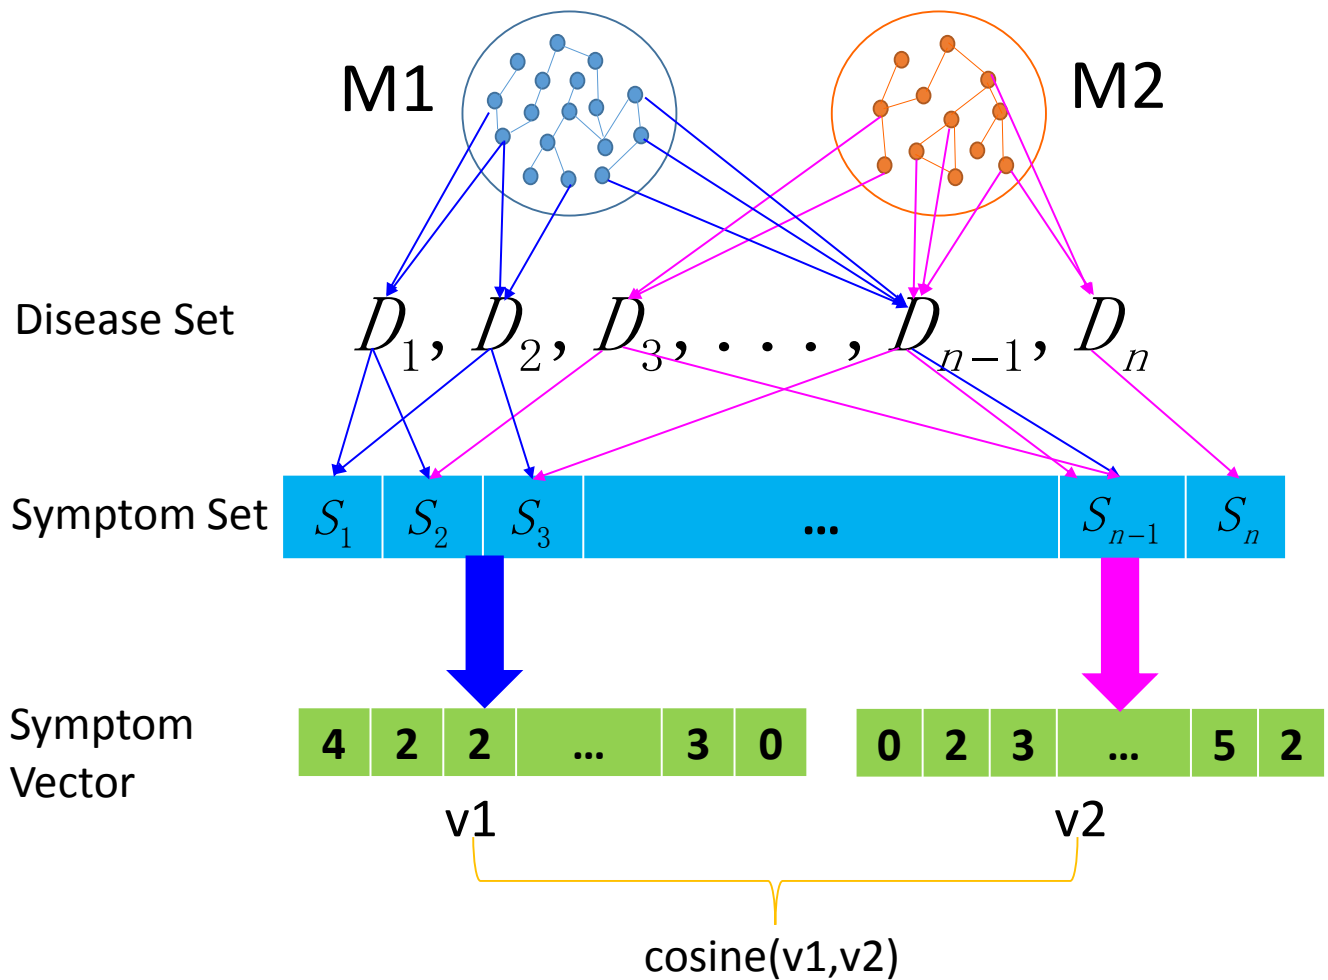

Figure 3. The process of symptom vector constructed for a module.

| Method | BP           | CC           | MF           | Pathway         |
|--------|--------------|--------------|--------------|-----------------|
| BGLL   | -0.21 (0.01) | -0.16 (0.05) | -0.17 (0.04) | 0.16 (0.04)     |
| RAK    | -0.14 (0.05) | -0.07 (0.31) | -0.11 (0.10) | 0.26 (1.40E-04) |
| NS     | 0.10 (0.45)  | 0.11 (0.41)  | 0.13 (0.32)  | 0.48 (1.98E-03) |
| WT     | -0.15 (0.01) | -0.09 (0.03) | -0.13 (0.09) | 0.07 (1.33E-03) |

Table 1. Correlation between module size and homogeneity. PCC(p-value)

| Method | BP              | CC              | MF          | Pathway          |
|--------|-----------------|-----------------|-------------|------------------|
| BGLL   | 0.15 (0.07)     | 0.16 (0.04)     | 0.11 (0.21) | -0.31 (1.51E-04) |
| RAK    | 0.11 (0.12)     | 0.15 (0.03)     | 0.16 (0.02) | -0.15 (2.27E-03) |
| NS     | -0.17 (0.21)    | 0.07 (0.61)     | 0.09 (0.50) | -0.16 (2.34E-04) |
| WT     | 0.18 (6.93E-05) | 0.19 (2.76E-05) | 0.11 (0.02) | -0.23 (6.59E-07) |

Table 2. Correlation between edge density and homogeneity. PCC(p-value)

| Method | PCC (p-value)   |
|--------|-----------------|
| BGLL   | 0.44 (<1E-127)  |
| RAK    | 0.39 (<1E-127)  |
| NS     | 0.45 (4.49E-76) |
| WT     | 0.31 (<1E-127)  |

Table 3. Correlation between module distance and phenotypic similarity. PCC(p-value)

| Method | BP          | CC          | MF              | Pathway     |
|--------|-------------|-------------|-----------------|-------------|
| BGLL   | 0.06 (0.45) | 0.06 (0.46) | 0.01 (0.93)     | 0.04 (0.58) |
| RAK    | 0.04 (0.48) | 0.05 (0.45) | 8.18E-03 (0.91) | 0.11 (0.65) |
| NS     | 0.12 (0.35) | 0.08 (0.56) | 4.75E-03 (0.76) | 0.02 (0.86) |
| WT     | 0.09 (0.04) | 0.07 (0.12) | 0.07 (0.19)     | 0.09 (0.05) |

Table 4. Correlation between disease ratio and homogeneity. PCC(p-value)

| number of proteins annotated by (or participated in) r GO terms (pathways) | PCC(p-value) |                |                |                 |                |
|----------------------------------------------------------------------------|--------------|----------------|----------------|-----------------|----------------|
|                                                                            | BP           | CC             | MF             | pathway         |                |
| BGLL                                                                       | 1            | 0.40(7.55E-07) | 0.31(2.04E-04) | 0.30(3.14E-04)  | 0.78(1.28E-29) |
|                                                                            | 2            | 0.25(2.29E-03) | 0.13(0.12)     | 0.36(8.63E-06)  | 0.36(1.07E-05) |
|                                                                            | 3            | 0.14(0.09)     | 0.02(0.84)     | 0.22(8.41E-03)  | 0.25(0.00326)  |
|                                                                            | 4            | 0.10(0.23)     | 0.11(0.20)     | -0.01(0.95)     | 0.06(0.47)     |
|                                                                            | >=5          | -0.049(0.56)   | 0.02(0.86)     | -0.02(0.78)     | 0.28(7.75E-04) |
| RAK                                                                        | 1            | 0.42(2.44E-10) | 0.15(0.03)     | 0.30(7.91E-06)  | 0.81(2.93E-50) |
|                                                                            | 2            | 0.24(3.64E-4)  | 0.15(0.03)     | 0.22(1.23E-03)  | 0.29(1.44E-05) |
|                                                                            | 3            | 0.14(0.04)     | 0.07(0.30)     | 0.21(1.92E-03)  | 0.22(1.13E-03) |
|                                                                            | 4            | 0.14(0.04)     | 0.11(0.09)     | 0.09(0.17)      | 0.26(1.43E-04) |
|                                                                            | >=5          | 0.01(0.88)     | 0.10(0.14)     | 0.07(0.32)      | 0.25(2.84E-04) |
| NS                                                                         | 1            | 0.59(1.62E-06) | 0.37(6.0E-03)  | 0.56(9.51E-06)  | 0.90(7.38E-21) |
|                                                                            | 2            | 0.31(0.02)     | 0.27(0.04)     | 0.41(2.14E-03)  | NaN            |
|                                                                            | 3            | 0.19(0.16)     | 0.06(0.67)     | 0.27(0.05)      | NaN            |
|                                                                            | 4            | 0.12(0.40)     | 0.19(0.16)     | -2.16E-03(0.98) | 0.41(1.88E-03) |
|                                                                            | >=5          | 0.14(0.30)     | 9.72E-02(0.48) | 0.05(0.71)      | 0.41(1.88E-03) |
| WT                                                                         | 1            | 0.27(5.72E-09) | 0.11(0.02)     | 0.31(9.31E-12)  | 0.81(5.2E-17)  |
|                                                                            | 2            | 0.18(7.68E-05) | 0.10(0.03)     | 0.18(1.28E-04)  | 0.37(1.99E-16) |
|                                                                            | 3            | 0.05(0.29)     | 0.07(0.11)     | 0.09(0.05)      | 0.21(6.03E-06) |
|                                                                            | 4            | 0.089(0.06)    | 0.09(0.06)     | 0.07(0.13)      | 0.16(6.51E-04) |
|                                                                            | >=5          | 7.83E-03(0.87) | 0.04(0.35)     | 0.02(0.71)      | 0.14(3.10E-03) |

Table 5. Correlation between the number of GO terms at different levels and homogeneity in terms of BP, CC, MF and pathway. PCC(p-value)
